# Supplementary material for: 1H-NMR Based Serum Metabolomics Study to Investigate Hepatoprotective Effect of Qin-Jiao on Carbon Tetrachloride-Induced Acute Hepatotoxicity in Rats
Source: Evid Based Complement Alternat Med. 2017 Nov 1;2017:6091589. doi: 10.1155/2017/6091589 (PMC5687146; doi:10.1155/2017/6091589)
Supplement: Supplementary file 1 — Table S1: VIP value of OPLS-DA models for Con vs Mod, SYL vs Mod, QJ2 vs Mod groups. Figure S1: Permutation test results of established OPLS-DA models. Permutation test was used to check the validity of OPLS models. The intercept is a measure of the overfit. Steep slope indicates well fit. (a) Permutation test for OPLS-DA model of Con and Mod groups; (b) permutation test for OPLS-DA model of SYL and Mod groups; (c) permutation test for OPLS-DA model of QJ2 and Mod groups. [file 6091589.f1.zip]

Archive with 2 entries (2 files):
- Fig.s1.pptx
- Table S1.docx
